# Supplementary material for: Large chromosomal deletions and impaired homologous recombination repairing in HEK293T cells exposed to polychlorinated biphenyl 153
Source: PeerJ. 2021 Jul 28;9:e11816. doi: 10.7717/peerj.11816 (PMC8325425; doi:10.7717/peerj.11816)
Supplement: Supplemental Information 3 [file peerj-09-11816-s003.xlsx]

## Sheet: Supplemental file_1
Name	Ct
GAPDH	20.22			3.35917
GAPDH	20.02	20.0433
GAPDH	19.89
BRCA1	23.62		3.57667	0.2175	0.860055
BRCA1	23.38		3.33667	-0.0225	1.01572	0.880075		Control-1
BRCA1	23.79		3.74667	0.3875	0.764453
GAPDH	20.01
GAPDH	19.99	19.9933
GAPDH	19.98
BRCA1	23.49		3.49667	0.1375	0.909093
BRCA1	23.61		3.61667	0.2575	0.836536	0.895594		Control-2
BRCA1	23.44		3.44667	0.0875	0.941152
GAPDH	19.84
GAPDH	19.69	20.7525
GAPDH	19.88
BRCA1	23.6		2.8475	-0.511667	1.4257
BRCA1	24.01		3.2575	-0.101667	1.07301	1.28878		Control-3
BRCA1	23.66		2.9075	-0.451667	1.36762
GAPDH	22.18
GAPDH	21.44	21.415
GAPDH	21.39
BRCA1	26.87		5.455	2.09583	0.233933
BRCA1	27.52		6.105	2.74583	0.149081	0.244236		15uMPCB153-1
BRCA1	26.29		4.875	1.51583	0.349694
GAPDH	21.55
GAPDH	21.8	21.64
GAPDH	21.57
BRCA1	26.44		4.8	1.44083	0.368354
BRCA1	27.22		5.58	2.22083	0.214517	0.312074		15uMPCB153-2
BRCA1	26.5		4.86	1.50083	0.353349
GAPDH	21.49
GAPDH	21.29	21.4133
GAPDH	21.46
BRCA1	26.68		5.26667	1.9075	0.266554
BRCA1	26.72		5.30667	1.9475	0.259265	0.287737		15uMPCB153-3
BRCA1	26.34		4.92667	1.5675	0.337393
GAPDH	20.22			5.06778
GAPDH	20.02	20.0433
GAPDH	19.89
RAD51B	24.87		4.82667	-0.241111	1.1819
RAD51B	24.83		4.78667	-0.281111	1.21513	1.27406		Control-1
RAD51B	24.6		4.55667	-0.511111	1.42515
GAPDH	20.01
GAPDH	19.99	19.9933
GAPDH	19.98
RAD51B	24.57		4.57667	-0.491111	1.40553
RAD51B	25.2		5.20667	0.138889	0.908218	1.08466		Control-2
RAD51B	25.15		5.15667	0.0888889	0.940247
GAPDH	19.84
GAPDH	19.69	19.8033
GAPDH	19.88
RAD51B	25.24		5.43667	0.368889	0.774379
RAD51B	25.44		5.63667	0.568889	0.674136	0.74276		Control-3
RAD51B	25.23		5.42667	0.358889	0.779765
GAPDH	22.18
GAPDH	21.44	21.415
GAPDH	21.39
RAD51B	28.13		6.715	1.64722	0.319254
RAD51B	28.03		6.615	1.54722	0.342168	0.33634		15uMPCB153-1
RAD51B	28.08		6.665	1.59722	0.330513
GAPDH	21.55
GAPDH	21.8	21.64
GAPDH	21.57
RAD51B	27.69		6.05	0.982222	0.506199
RAD51B	29.05		7.41	2.34222	0.197206	0.297526		15uMPCB153-2
RAD51B	29.11		7.47	2.40222	0.189173
GAPDH	21.49
GAPDH	21.29	21.4133
GAPDH	21.46
RAD51B	28.26		6.84667	1.77889	0.291408
RAD51B	28.35		6.93667	1.86889	0.273784	0.25383		15uMPCB153-3
RAD51B	28.83		7.41667	2.34889	0.196297
Name	Ct
β-actin	15.63
β-actin	15.4	15.3333		6.14917
β-actin	14.97
BRCA1	21.08		5.74667	-0.4025	1.3218
BRCA1	20.97		5.63667	-0.5125	1.42652	1.41525		Control-1
BRCA1	20.9		5.56667	-0.5825	1.49744
β-actin	15.39
β-actin	15.25	15.2833
β-actin	15.21
BRCA1	21.18		5.89667	-0.2525	1.19127
BRCA1	21.26		5.97667	-0.1725	1.12701	1.17539		Control-2
BRCA1	21.16		5.87667	-0.2725	1.2079
β-actin	15.08
β-actin	14.91	14.9533
β-actin	14.87
BRCA1	21.21		6.25667	0.1075	0.928195
BRCA1	21.17		6.21667	0.0675	0.95429	0.939046		Control-3
BRCA1	21.2		6.24667	0.0975	0.934651
β-actin	17.82
β-actin	17.75	17.75
β-actin	17.68
BRCA1	25.33		7.58	1.43083	0.370917
BRCA1	25.68		7.93	1.78083	0.291015	0.359745		15uMPCB153-1
BRCA1	25.16		7.41	1.26083	0.417303
β-actin	17.77
β-actin	17.62	17.5333
β-actin	17.21
BRCA1	25.34		7.80667	1.6575	0.316988
BRCA1	25.25		7.71667	1.5675	0.337393	0.413938		15uMPCB153-2
BRCA1	24.45		6.91667	0.7675	0.587435
β-actin	17.7
β-actin	17.44	17.6567
β-actin	17.83
BRCA1	24.38		6.72333	0.574167	0.671674
BRCA1	24.42		6.76333	0.614167	0.653307	0.706074		15uMPCB153-3
BRCA1	24.14		6.48333	0.334167	0.793242
β-actin	15.63
β-actin	15.4	15.3333		7.41222
β-actin	14.97
RAD51B	22.53		7.19667	-0.215556	1.16115
RAD51B	22.48		7.14667	-0.265556	1.2021	1.16683		Control-1
RAD51B	22.56		7.22667	-0.185556	1.13725
β-actin	15.39
β-actin	15.25	15.2833
β-actin	15.21
RAD51B	22.4		7.11667	-0.295556	1.22736
RAD51B	22.62		7.33667	-0.0755556	1.05377	1.1092		Control-2
RAD51B	22.63		7.34667	-0.0655556	1.04649
β-actin	15.08
β-actin	14.91	14.9533
β-actin	14.87
RAD51B	22.85		7.89667	0.484444	0.714772
RAD51B	22.45		7.49667	0.0844444	0.943148	0.782781		Control-3
RAD51B	22.9		7.94667	0.534444	0.690424
β-actin	17.82
β-actin	17.75	17.75
β-actin	17.68
RAD51B	26.39		8.64	1.22778	0.426975
RAD51B	25.7		7.95	0.537778	0.688831	0.553337		15uMPCB153-1
RAD51B	26.04		8.29	0.877778	0.544205
β-actin	17.77
β-actin	17.62	17.5333
β-actin	17.21
RAD51B	25.89		8.35667	0.944444	0.51963
RAD51B	26.26		8.72667	1.31444	0.40208	0.486555		15uMPCB153-2
RAD51B	25.84		8.30667	0.894444	0.537954
β-actin	17.7
β-actin	17.44	17.6567
β-actin	17.83
RAD51B	25.63		7.97333	0.561111	0.67778
RAD51B	25.79		8.13333	0.721111	0.60663	0.615502		15uMPCB153-3
RAD51B	25.9		8.24333	0.831111	0.562096
