# Supplementary material for: Large chromosomal deletions and impaired homologous recombination repairing in HEK293T cells exposed to polychlorinated biphenyl 153
Source: PeerJ. 2021 Jul 28;9:e11816. doi: 10.7717/peerj.11816 (PMC8325425; doi:10.7717/peerj.11816)
Supplement: Supplemental Information 4 [file peerj-09-11816-s004.xlsx]

## Sheet: Supplemental file_2
Name	Ct
GAPDH	19.46			7.46278
GAPDH	18.94	18.895
GAPDH	18.85
RAD51C	26.28		7.385	-0.0777778	1.05539
RAD51C	26.16		7.265	-0.197778	1.14693	1.1299		Control-1
RAD51C	26.11		7.215	-0.247778	1.18738
GAPDH	18.66
GAPDH	18.92	18.7433
GAPDH	18.65
RAD51C	25.98		7.23667	-0.226111	1.16968
RAD51C	26.49		7.74667	0.283889	0.821374	1.01507		Control-2
RAD51C	26.13		7.38667	-0.0761111	1.05417
GAPDH	18.85
GAPDH	18.54	18.6767
GAPDH	18.64
RAD51C	26.45		7.77333	0.310556	0.806331
RAD51C	26.14		7.46333	0.000555555	0.999615	0.886084		Control-3
RAD51C	26.37		7.69333	0.230556	0.852307
GAPDH	20.88
GAPDH	20.35	20.5267
GAPDH	20.35
RAD51C	29.98		9.45333	1.99056	0.251642
RAD51C	29.46		8.93333	1.47056	0.360843	0.391599		15uMPCB153-1
RAD51C	28.82		8.29333	0.830556	0.562313
GAPDH	20.2
GAPDH	20.35	20.31
GAPDH	20.38
RAD51C	29.36		9.05	1.58722	0.332812
RAD51C	28.92		8.61	1.14722	0.451494	0.422735		15uMPCB153-2
RAD51C	28.82		8.51	1.04722	0.483899
GAPDH	20.21
GAPDH	20.89	20.55
GAPDH	20.55
RAD51C	28.57		8.02	0.557222	0.67961
RAD51C	29.24		8.69	1.22722	0.427139	0.600213		15uMPCB153-3
RAD51C	28.54		7.99	0.527222	0.69389
β-actin	12.22
β-actin	12.15	12.1867
β-actin	12.19
RAD51C	16.58		4.39333	0.00888889	0.993858
RAD51C	16.55		4.36333	-0.0211111	1.01474	1.00082		Control-1
RAD51C	16.58		4.39333	0.00888889	0.993858
β-actin	14.45			4.43556
β-actin	13.97	14.1867
β-actin	14.14
RAD51C	18.3		4.11333	-0.271111	1.20674
RAD51C	18.16		3.97333	-0.411111	1.32971	1.23673		Control-2
RAD51C	18.34		4.15333	-0.231111	1.17374
β-actin	14.07
β-actin	14.04	14.0267
β-actin	13.97
RAD51C	18.48		4.45333	0.0688889	0.953372
RAD51C	18.32		4.29333	-0.0911111	1.06519	1.01582		Control-3
RAD51C	18.37		4.34333	-0.0411111	1.02891
β-actin	12.13
β-actin	12.16	12.1733
β-actin	12.23
RAD51C	16.58		4.40667	0.0222222	0.984715
RAD51C	16.62		4.44667	0.0622222	0.957788	0.901486		15uMPCB153-1
RAD51C	16.95		4.77667	0.392222	0.761955
β-actin	12.38
β-actin	12.14	12.1967
β-actin	12.07
RAD51C	16.67		4.47333	0.0888889	0.940247
RAD51C	16.82		4.62333	0.238889	0.847398	0.902847		15uMPCB153-2
RAD51C	16.7		4.50333	0.118889	0.920897
β-actin	13.84
β-actin	13.81	13.6933
β-actin	13.43
RAD51C	18.5		4.80667	0.422222	0.746274
RAD51C	18.46		4.76667	0.382222	0.767255	0.800335		15uMPCB153-3
RAD51C	18.25		4.55667	0.172222	0.887475
